# Supplementary material
Source: PubMed Central journal article supplement (PMC6167205)
Supplement: NIHMS955352-supplement-Supp_info.pdf [file NIHMS955352-supplement-Supp_info.pdf]

# **Biliary Atresia: A Clinical and Translational Science Research Workshop**

**Jun 28, 2017**

8:00 a.m. – 8:10 a.m.

**Welcome and Introduction**  
Edward Doo and Ronald Sokol

## **Session I**

**Clinical Aspects and Genetics of Biliary Atresia (BA)**  
**Moderator: Ronald Sokol**

8:10 a.m. – 8:30 a.m.

**Biliary atresia: A clinical challenge in the 21st Century**  
Ronald Sokol

8:30 a.m. – 8:50 a.m.

**Clinical Variants of biliary atresia**  
Mark Davenport

8:50 a.m. – 9:10 a.m.

**Genetic Susceptibility and Causation of BA**  
Nancy Spinner

9:10 a.m. – 9:30 a.m.

**Prenatal versus Postnatal onset of BA: Implications for pathogenesis**  
Benjamin Shneider

9:30 a.m. – 9:45 a.m.

**Discussion**

9:45 a.m. – 10:00 a.m.

**Break and Poster Viewing**

## **Session II**

**Cholangiocyte Biology, Injury and Fibrosis**  
**Moderator: Rebecca Wells**

10:00 a.m. – 10:20 a.m.

**Embryology and Regulation of Bile Duct Development and BA**  
Frederick Lemaigre

10:20 a.m. – 10:40 a.m.

**Genetic Variation in the Proteostatic Stress Response – Potential BA Risk Factor**  
Michael Pack

10:40 a.m. – 11:00 a.m.

**Biliatresone: Novel toxic injury to the cholangiocyte**  
Rebecca Wells

11:00 a.m. – 11:20 a.m.

**Mechanisms of Fibrosis in Cholangiopathies**  
Mario Strazzabosco

|                                               |                                                                                                                             |
|-----------------------------------------------|-----------------------------------------------------------------------------------------------------------------------------|
| 11:20 a.m. – 11:40 a.m.                       | <b>Discussion</b>                                                                                                           |
| 11:40 a.m. – 12:40 p.m.<br><b>Session III</b> | <b>Lunch (on your own) and Poster Viewing<br/>Inflammation and Fibrosis in Biliary Atresia<br/>Moderator: Jorge Bezerra</b> |
| 12:40 p.m. – 1:00 p.m.                        | <b>Role of Viruses in Biliary Atresia: From mouse models to human data</b><br>Claus Petersen                                |
| 1:00 p.m – 1:20 p.m.                          | <b>Immunologic Effectors of Biliary Atresia: Injury and survival signals</b><br>Jorge Bezerra                               |
| 1:20 p.m. – 1:40 p.m.                         | <b>Autoimmunity in Biliary Atresia</b><br>Cara Mack                                                                         |
| 1:40 p.m. – 2:00 p.m.                         | <b>Liver Fibrosis in Biliary Atresia</b><br>Mikko Pakarinen                                                                 |
| 2:00 p.m.. – 2:20 p.m.                        | <b>Discussion</b>                                                                                                           |
| 2:20 p.m. – 2:35 p.m.                         | <b>Break and Poster Viewing and Removal</b>                                                                                 |
| <b>Session IV</b>                             | <b>Translating Science into Action<br/>Moderator: Saul Karpen</b>                                                           |
| 2:35 p.m.. – 2:55 p.m.                        | <b>Novel Therapeutic Targets and Strategies</b><br>Saul Karpen                                                              |
| 2:55 p.m – 3:15 p.m.                          | <b>Epigenetic Targets in Obstructive Cholestasis</b><br>Frederick Suchy                                                     |
| 3:15 p.m. – 3:35 p.m.                         | <b>Biliary Organoids to Model Biliary Diseases</b><br>Ludovic Vallier                                                       |
| 3:35 p.m. – 3:55 p.m.                         | <b>Cell based therapeutics: Is there a role in biliary atresia?</b><br>Holger Willenbring                                   |
| 3:55 p.m. – 4:20 p.m.                         | <b>Discussion</b>                                                                                                           |
| <b>Session V</b>                              | <b>Moderators: Jay Hoofnagle, Ronald Sokol, Rebecca Wells,<br/>Jorge Bezerra</b>                                            |
| 4:20 p.m. – 5:00 p.m.                         | <b>Defining research challenges, priorities, and opportunities</b>                                                          |

**for biliary atresia**  
Audience and Moderators
